# Supplementary material for: An injectable dipeptide–fullerene supramolecular hydrogel for photodynamic antibacterial therapy
Source: Royal Society of Chemistry journal article supplement (doi:10.1039/c8tb01487f), 2018-01-01
Supplement: c8tb01487f1.pdf [file c8tb01487f1.pdf]

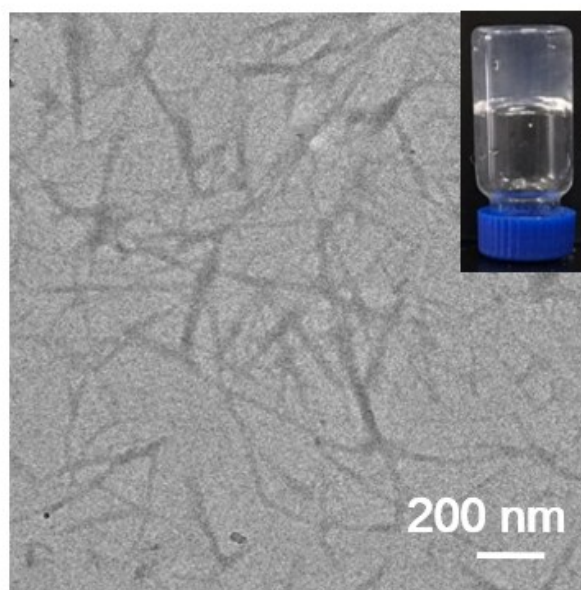

**Figure S1.** TEM image of Fmoc-FF hydrogel (inset is the photograph of the hydrogel).

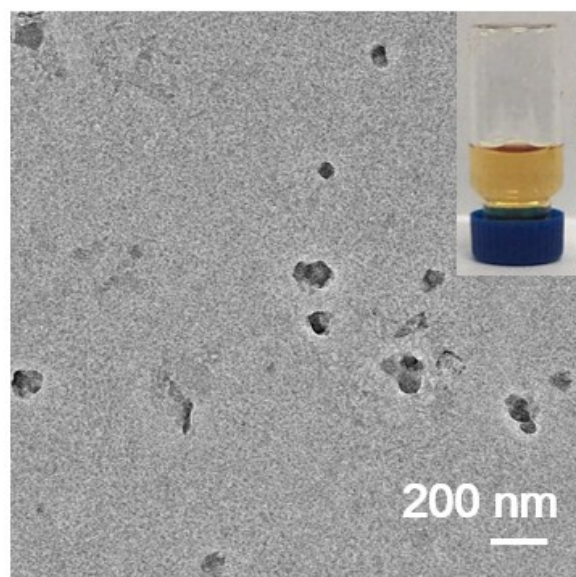

**Figure S2.** TEM image of C<sub>60</sub>-PTC aggregates in aqueous solution aged for 1 day (inset is the photograph of the solution).
